# Supplementary material
Source: Elsevier journal article supplement (https://www.sciencedirect.com/science/article/pii/S0033833821001867)
Supplement: mmc1 [file S0033833821001867:mmc1.doc]

**Anexo 1**

Encuesta realizada a profesionales sanitarios expuestos a radiaciones ionizantes.

1. Sexo. Seleccione una respuesta.

1.1. Femenino

1.2. Masculino

2. Edad. Seleccione una respuesta.

2.1. <30 años

2.2. 31-45 años

2.3. 46-60 años

2.4. >61 años

3. Profesión. Seleccione una respuesta.

3.1. Médico radiólogo

3.2. Graduado o diplomado en Enfermería

3.3. T.E.R.

4. Situación civil. Seleccione una respuesta.

4.1. Solter@

4.2. Divorciad@/Separad@/Viud@

4.3. En pareja

5. Edad en la que se ha tenido el primer hijo. Seleccione una respuesta.

5.1. <30 años

5.2. 31-45 años

5.3. 46-60 años

5.4. >61 años

6. Número de hijos. Seleccione una respuesta.

6.1. 1

6.2. 2

6.3. 3

6.4. >3

6.5. Sin hijos

7. Ejercicio de la actividad profesional. Seleccione una respuesta.

7.1. Sanidad pública

7.2. Sanidad privada

7.3. Ambas

7.4. Jubilad@/Pensionista

8. ¿Considera adecuado que una trabajadora embarazada expuesta a radiaciones ionizantes cambie de puesto de trabajo o actividad o se encuentre en situación de baja desde el inicio de la gestación? Seleccione una respuesta.

8.1. No lo considero adecuado. Puede mantenerse en su puesto de trabajo con la protección adecuada.

8.2. No se/no contesto.

8.3. Puede mantenerse en su puesto de trabajo, incluyendo la realización de guardias, pero evitando las situaciones con mayor exposición a las radiaciones ionizantes.

8.4. Debe cambiar de puesto de trabajo o actividad dentro de su área, pero no darse de baja.

8.5. Debe ser baja laboral desde el mismo momento de conocerse la situación de embarazo.

9. Lea a continuación un resumen del artículo “**Occupational Radiation Protection of Pregnant or Potentially Pregnant Workers in IR: A Joint Guideline of the Society of Interventional Radiology and the Cardiovascular and Interventional Radiology Society of Europe”,** realizado por expertos de las dos sociedades científicas más relevantes a nivel mundial en radiología intervencionista y expertos en física médica y radioprotección a nivel mundial:

“La dosis de radiación máxima permitida para una trabajadora embarazada durante todo el periodo del embarazo es de 2 mSv/año en Europa y de 5 mSv/año en EE. UU. Se conoce que la dosis media anual recibida por médicos (guía fluoroscópica) es de 1,6 mSv; para TER y DUE (trabajadores de las salas de RVI) es de 1,1 mSv. No hay evidencias de que dosis inferiores a 100 mGy durante el embarazo se asocien a un incremento de malformaciones congénitas, mortalidad perinatal, abortos, retraso en crecimiento o alteraciones mentales. No existen evidencias o diferencias estadísticamente significativas que demuestran un aumento de cáncer en la descendencia de las profesionales expuestas a radiaciones. Manteniendo las medidas de seguridad, una mujer trabajadora en una sala con fluoroscopia generalmente no necesita limitar su tiempo de procedimiento para mantener una dosis al feto por debajo de la dosis límite. La exclusión de las trabajadoras embarazadas basándose en el riesgo de radiación no puede justificarse científicamente y podría modificar las decisiones de trabajadoras femeninas a la hora de realizar la especialidad”.

**Responda ahora nuevamente a la pregunta anterior:** ¿Considera adecuado que una trabajadora embarazada expuesta a radiaciones ionizantes cambie de puesto de trabajo o actividad o se encuentre en situación de baja desde el inicio de la gestación?

1.1. No lo considero adecuado. Puede mantenerse en su puesto de trabajo con la protección adecuada.

1.2. No se/no contesto.

1.3. Puede mantenerse en su puesto de trabajo, incluyendo la realización de guardias, pero evitando las situaciones con mayor exposición a las radiaciones ionizantes.

1.4. Debe cambiar de puesto de trabajo o actividad dentro de su área, pero no darse de baja.

1.5. Debe ser baja laboral desde el mismo momento de conocerse la situación.

1. Si desea realizar algún comentario, puede realizarlo a continuación.
